# Supplementary material
Source: PubMed Central journal article supplement (PMC7442905)
Supplement: mmc2.pdf [file mmc2.pdf]

Database: Ovid MEDLINE: Epub Ahead of Print, In-Process & Other Non-Indexed Citations, Ovid MEDLINE® Daily and Ovid MEDLINE® <1946-Present>

Search Strategy:

- 1 pandemic/
- 2 disease outbreak/
- 3 disasters/
- 4 (disease\* or influenza or flu).ti,ab,kf,hw.
- 5 3 and 4
- 6 (pandemic\* or outbreak\* or "Severe Acute Respiratory Syndrome" or sars\* or ebola\* or h1n1 or h5n1 or h7n9 or bird flu or avian flu or coronavir\* or corona virus\* or covid\* or ncov\* or ((disease\* or influenza\*) adj2 epidemic\*)).ti,ab,kf,hw.
- 7 (quarantine\* or self-isolat\* or "shelter\* in place").ti,ab,kf,hw.
- 8 1 or 2 or 5 or 6 or 7
- 9 mental health services/
- 10 community mental health services/
- 11 ((mental health or mental disorder\* or (mental\* adj ill\*) or psychiatr\* or psycholog\* or depress\* or anxiety\* or affective\* or mood\* or personality disorder\* or psychosis or psychoses or psychotic or schizo\* or manic or mania or "use disorder\*" or eating disorder\* or addict\* or substance\* or trauma\* or stress) adj3 (program\* or intervention\* or service\* or treatment\*)).ti,ab,kf,hw.
- 12 9 or 10 or 11
- 13 8 and 12
- 14 limit 13 to yr="2003-Current"
